# Supplementary material for: Sgs1's roles in DNA end resection, HJ dissolution, and crossover suppression require a two-step SUMO regulation dependent on Smc5/6
Source: PubMed Central journal article supplement (PMC4911932; doi:10.1101/gad.278275.116), 2016-06-01

### Figure S6

**A**

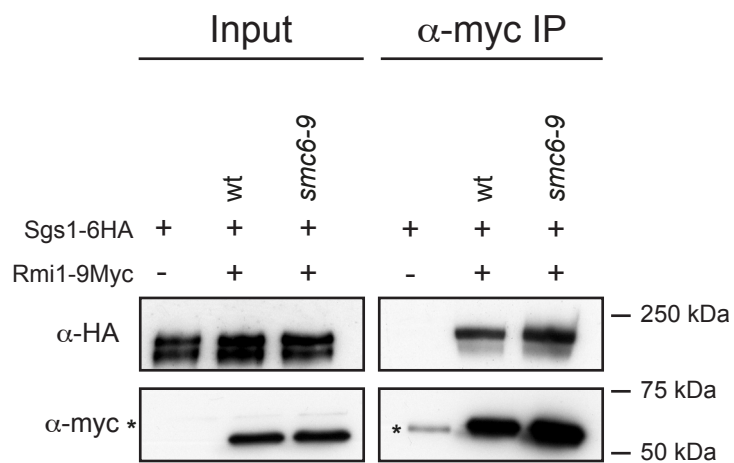

**B**

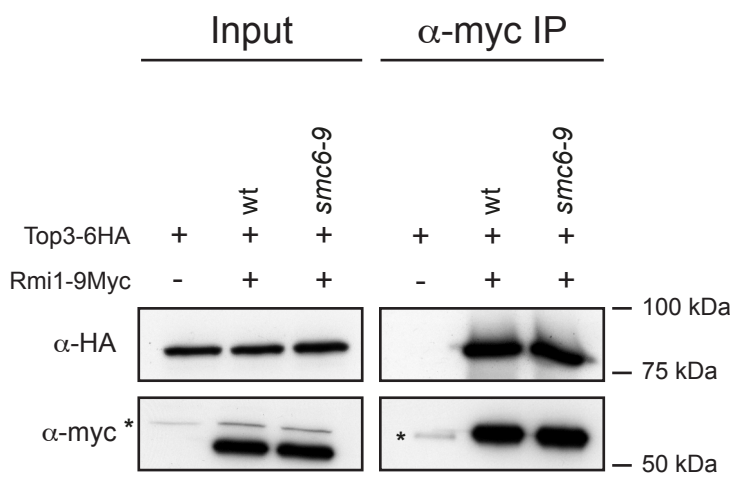

Supplement: supp_30.11.1339_Supplemental_Figure_S6.pdf [file supp_30.11.1339_Supplemental_Figure_S6.pdf]
