# Supplementary material for: Sgs1's roles in DNA end resection, HJ dissolution, and crossover suppression require a two-step SUMO regulation dependent on Smc5/6
Source: PubMed Central journal article supplement (PMC4911932; doi:10.1101/gad.278275.116), 2016-06-01

**Figure S8****A**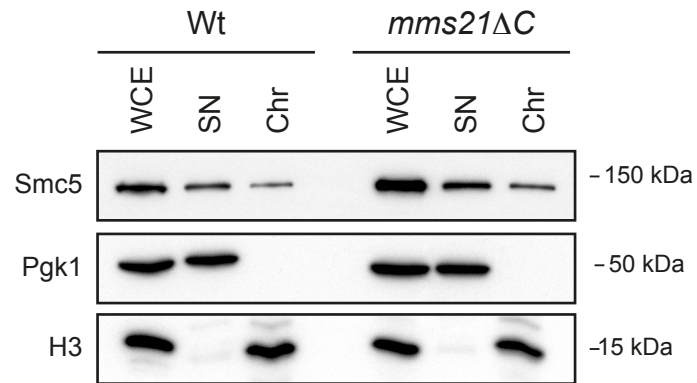**B**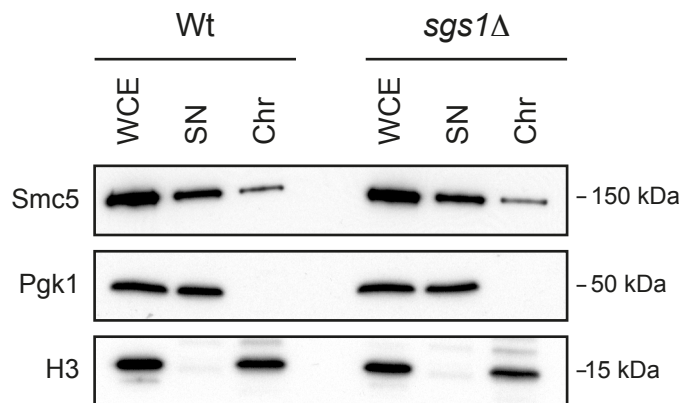

Supplement: supp_30.11.1339_Supplemental_Figure_S8.pdf [file supp_30.11.1339_Supplemental_Figure_S8.pdf]
